# Supplementary material for: Highly stable aqueous foams generated by fumed silica particles hydrophobised in situ with a quaternary ammonium gemini surfactant
Source: Royal Society of Chemistry journal article supplement (doi:10.1039/c6ra02063a), 2016-01-01
Supplement: c6ra02063a1.pdf [file c6ra02063a1.pdf]

## Supporting Information

### Highly stable aqueous foams generated by fumed silica particles hydrophobised *in situ* with a quaternary ammonium gemini surfactant†

Xiaoxiang Sun,<sup>a</sup> Yu Chen<sup>a</sup> and Jianxi Zhao<sup>\*a</sup>

<sup>a</sup> Institute of Colloid and Interface Chemistry, College of Chemistry and Chemical Engineering, Fuzhou University, Fuzhou, Fujian, 350108, China

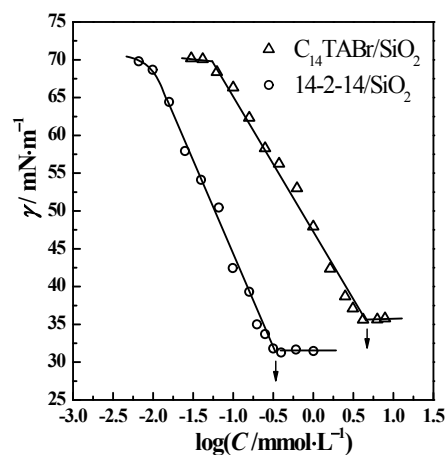

Fig. S1 Semi-logarithmic plots of surface tension ( $\gamma$ ) as a function of surfactant concentration for the aqueous solution of 14-2-14 ( $\circ$ ) and  $\text{C}_{14}\text{TABr}$

( $\triangle$ ) in the presence of 0.05wt% F- $\text{SiO}_2$  at 25 °C, in which the critical micelle concentration (cmc) was obtained for each case as shown by arrow.

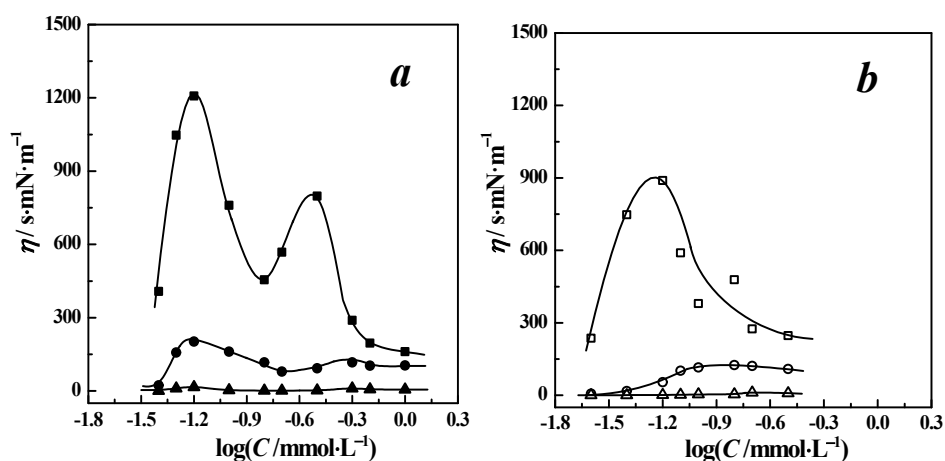

Fig. S2 Semi-logarithmic plots of dilational interfacial viscosity ( $\eta$ ) for 14-2-14/F- $\text{SiO}_2$  (a) and 14-2-14 (b) as a function of 14-2-14 concentration at

25 °C. Symbols representation:  $\nu/\text{Hz} = 0.01$  (squares), 0.10(circles), and 1.00 (triangles).
